# Supplementary material for: Impact of low-dose CT screening on smoking cessation among high-risk participants in the UK Lung Cancer Screening Trial
Source: Thorax. 2017 Jul 14;72(10):912–8. doi: 10.1136/thoraxjnl-2016-209690 (PMC5738533; doi:10.1136/thoraxjnl-2016-209690)
Supplement: Supplementary table I [file thoraxjnl-2016-209690supp001.pdf]

**Supplementary Table I. Baseline comparison of smokers who did/did not complete T<sub>1</sub> questionnaires**

|                                                    |                             | <b>T<sub>1</sub> completers<br/>(n=1006)<br/>n (%) or mean (SD)</b> | <b>T<sub>1</sub> non-completers<br/>(n=538)<sup>‡</sup><br/>n (%) or mean (SD)</b> | <b>P value</b> |
|----------------------------------------------------|-----------------------------|---------------------------------------------------------------------|------------------------------------------------------------------------------------|----------------|
| <b>Trial allocation</b>                            | Intervention                | 527 (52%)                                                           | 231 (43%)                                                                          | <0.001         |
|                                                    | Control                     | 479 (48%)                                                           | 307 (57%)                                                                          |                |
| <b>Site</b>                                        | Liverpool                   | 540 (54%)                                                           | 315 (59%)                                                                          | 0.08           |
|                                                    | Cambridge                   | 466 (46%)                                                           | 223 (41%)                                                                          |                |
| <b>Age</b>                                         | Up to 65 years              | 408 (66%)                                                           | 206 (34%)                                                                          | 0.02           |
|                                                    | 66 – 70 years               | 444 (67%)                                                           | 220 (33%)                                                                          |                |
|                                                    | Over 70 years               | 154 (58%)                                                           | 112 (42%)                                                                          |                |
| <b>Gender</b>                                      | Male                        | 701 (70%)                                                           | 381 (71%)                                                                          | 0.69           |
|                                                    | Female                      | 305 (30%)                                                           | 157 (29%)                                                                          |                |
| <b>Marital group</b>                               | Married/cohabiting          | 668 (67%)                                                           | 352 (65%)                                                                          | 0.68           |
|                                                    | Not married/cohabiting      | 335 (33%)                                                           | 186 (35%)                                                                          |                |
| <b>IMD</b>                                         | Quintile 1 (most deprived)  | 346 (34%)                                                           | 183 (34%)                                                                          | 0.07           |
|                                                    | Quintile 2                  | 109 (11%)                                                           | 81 (15%)                                                                           |                |
|                                                    | Quintile 3                  | 160 (16%)                                                           | 93 (17%)                                                                           |                |
|                                                    | Quintile 4                  | 162 (16%)                                                           | 82 (15%)                                                                           |                |
|                                                    | Quintile 5 (least deprived) | 229 (23%)                                                           | 99 (18%)                                                                           |                |
| <b>Lung cancer experience</b>                      |                             | No                                                                  | 600 (60%)                                                                          | <0.001         |
|                                                    |                             | Yes                                                                 | 403 (40%)                                                                          |                |
| <b>Cancer distress (T<sub>0</sub>)<sup>+</sup></b> |                             | 2.24 (0.29)                                                         | 2.23 (0.32)                                                                        | 0.60           |
|                                                    |                             | 9.77 (2.87)                                                         | 9.81 (3.34)                                                                        |                |

Note: percentages were calculated based on available data.

<sup>‡</sup> Non-completers included non-responders and ineligible responders.

<sup>+</sup> Log<sub>n</sub> scores in normal text, original scores in italics (analyses performed using log<sub>n</sub> scores).
