# Supplementary material for: Impact of low-dose CT screening on smoking cessation among high-risk participants in the UK Lung Cancer Screening Trial
Source: PubMed Central journal article supplement (PMC5738533; doi:10.1136/thoraxjnl-2016-209690), 2017-07-14
Supplement: thoraxjnl-2016-209690supp003.pdf [file thoraxjnl-2016-209690supp003.pdf]

**Supplementary Table III. Predictors of T<sub>1</sub> smoking cessation using the imputed population**

|                                                    |                             | Quit smoking at T <sub>1</sub> (n=1544) |                                |                            |                                           |
|----------------------------------------------------|-----------------------------|-----------------------------------------|--------------------------------|----------------------------|-------------------------------------------|
|                                                    |                             | Yes (n=111)<br>n (%) or M (SD)          | No (n=1433)<br>n (%) or M (SD) | Univariable OR<br>(95% CI) | Multivariable OR <sup>^</sup><br>(95% CI) |
| <b>Trial allocation</b>                            | Intervention                | 75 (68%)                                | 683 (48%)                      | 2.29 (1.52 to 3.45)        | 2.38 (1.56 to 3.64)                       |
|                                                    | Control                     | 36 (32%)                                | 750 (52%)                      |                            |                                           |
| <b>Site</b>                                        | Liverpool                   | 54 (49%)                                | 801 (56%)                      | 1.34 (0.91 to 1.97)        | 1.33 (0.79 to 2.25)                       |
|                                                    | Cambridge                   | 57 (51%)                                | 632 (44%)                      |                            |                                           |
| <b>Age group</b>                                   | Up to 65 years              | 42 (38%)                                | 572 (40%)                      | - Reference -              | - Reference -                             |
|                                                    | 66 – 70 years               | 52 (47%)                                | 612 (43%)                      | 1.16 (0.76 to 1.77)        | 1.18 (0.76 to 1.83)                       |
|                                                    | Over 70 years               | 17 (15%)                                | 249 (17%)                      | 0.93 (0.52 to 1.67)        | 0.98 (0.54 to 0.78)                       |
| <b>Gender</b>                                      | Male                        | 77 (69%)                                | 1005 (70%)                     | 1.04 (0.68 to 1.58)        | 1.01 (0.65 to 1.60)                       |
|                                                    | Female                      | 34 (31%)                                | 428 (30%)                      |                            |                                           |
| <b>Marital group</b>                               | Married/cohabiting          | 77 (70%)                                | 943 (66%)                      | 0.83 (0.54 to 1.26)        | 0.88 (0.56 to 1.39)                       |
|                                                    | Not married/cohabiting      | 33 (30%)                                | 488 (34%)                      |                            |                                           |
| <b>IMD</b>                                         | Quintile 1 (most deprived)  | 34 (31%)                                | 495 (35%)                      | - Reference -              | - Reference -                             |
|                                                    | Quintile 2                  | 13 (12%)                                | 177 (12%)                      | 1.07 (0.55 to 2.07)        | 1.02 (0.50 to 2.04)                       |
|                                                    | Quintile 3                  | 23 (21%)                                | 230 (16%)                      | 1.46 (0.84 to 2.53)        | 1.16 (0.61 to 2.19)                       |
|                                                    | Quintile 4                  | 16 (14%)                                | 228 (16%)                      | 1.02 (0.55 to 1.89)        | 0.93 (0.46 to 1.89)                       |
|                                                    | Quintile 5 (least deprived) | 25 (22%)                                | 303 (21%)                      | 1.20 (0.70 to 2.05)        | 1.00 (0.49 to 2.03)                       |
| <b>Lung cancer experience</b>                      | No                          | 65 (60%)                                | 808 (56%)                      | 0.86 (0.57 to 1.28)        | 0.89 (0.59 to 1.36)                       |
|                                                    | Yes                         | 43 (40%)                                | 624 (44%)                      |                            |                                           |
| <b>Cancer distress (T<sub>0</sub>)<sup>+</sup></b> |                             | 2.30 (0.30)<br><i>9.97</i>              | 2.23 (0.30)<br><i>9.30</i>     | 2.02 (1.07 to 3.83)        | 2.43 (1.22 to 4.87)                       |

<sup>^</sup> Adjusted for T<sub>0</sub> cancer distress, recruitment site, gender, age, marital group, deprivation and experience of lung cancer.

<sup>+</sup> Log<sub>n</sub> scores in normal text, original scores in italics (analyses performed using log<sub>n</sub> scores).
