# Supplementary material for: Impact of low-dose CT screening on smoking cessation among high-risk participants in the UK Lung Cancer Screening Trial
Source: PubMed Central journal article supplement (PMC5738533; doi:10.1136/thoraxjnl-2016-209690), 2017-07-14
Supplement: thoraxjnl-2016-209690supp004.pdf [file thoraxjnl-2016-209690supp004.pdf]

**Supplementary Table IV. Predictors of T<sub>1</sub> smoking cessation using complete case analysis**

|                                                    |                             | Quit smoking at T <sub>1</sub> (n=1006) |                               |                            |                                           |
|----------------------------------------------------|-----------------------------|-----------------------------------------|-------------------------------|----------------------------|-------------------------------------------|
|                                                    |                             | Yes (n=111)<br>n (%) or M (SD)          | No (n=895)<br>n (%) or M (SD) | Univariable OR<br>(95% CI) | Multivariable OR <sup>^</sup><br>(95% CI) |
| <b>Trial allocation</b>                            | Intervention                | 75 (68%)                                | 452 (50%)                     | 2.04 (1.34 to 3.10)        | 2.09 (1.36 to 3.23)                       |
|                                                    | Control                     | 36 (32%)                                | 443 (50%)                     |                            |                                           |
| <b>Site</b>                                        | Liverpool                   | 54 (49%)                                | 486 (54%)                     | 1.26 (0.85 to 1.87)        | 1.32 (0.76 to 2.32)                       |
|                                                    | Cambridge                   | 57 (51%)                                | 409 (46%)                     |                            |                                           |
| <b>Age group</b>                                   | Up to 65 years              | 42 (38%)                                | 366 (41%)                     | - Reference -              |                                           |
|                                                    | 66 – 70 years               | 52 (47%)                                | 392 (44%)                     | 1.16 (0.75 to 1.78)        | 1.19 (0.76 to 1.86)                       |
|                                                    | Over 70 years               | 17 (15%)                                | 137 (15%)                     | 1.08 (0.59 to 1.96)        | 1.09 (0.59 to 2.01)                       |
| <b>Gender</b>                                      | Male                        | 77 (69%)                                | 624 (70%)                     | 1.03 (0.67 to 1.59)        | 0.99 (0.63 to 1.55)                       |
|                                                    | Female                      | 34 (31%)                                | 271 (30%)                     |                            |                                           |
| <b>Marital group</b>                               | Married/cohabiting          | 77 (70%)                                | 591 (66%)                     | 0.83 (0.54 to 1.27)        | 0.86 (0.54 to 1.35)                       |
|                                                    | Not married/cohabiting      | 33 (30%)                                | 302 (34%)                     |                            |                                           |
| <b>IMD</b>                                         | Quintile 1 (most deprived)  | 34 (31%)                                | 312 (34%)                     | - Reference -              |                                           |
|                                                    | Quintile 2                  | 13 (12%)                                | 96 (11%)                      | 1.25 (0.63 to 2.46)        | 1.18 (0.58 to 2.41)                       |
|                                                    | Quintile 3                  | 23 (21%)                                | 137 (15%)                     | 1.56 (0.89 to 2.76)        | 1.21 (0.64 to 2.28)                       |
|                                                    | Quintile 4                  | 16 (14%)                                | 146 (16%)                     | 1.02 (0.54 to 1.90)        | 0.94 (0.46 to 1.92)                       |
|                                                    | Quintile 5 (least deprived) | 25 (22%)                                | 204 (23%)                     | 1.13 (0.65 to 1.95)        | 0.95 (0.44 to 2.05)                       |
| <b>Lung cancer experience</b>                      | No                          | 65 (60%)                                | 535 (60%)                     | 0.97 (0.65 to 1.46)        | 1.02 (0.67 to 1.58)                       |
|                                                    | Yes                         | 43 (40%)                                | 360 (40%)                     |                            |                                           |
| <b>Cancer distress (T<sub>0</sub>)<sup>+</sup></b> |                             | 2.30 (0.30)<br><i>9.97</i>              | 2.23 (0.29)<br><i>9.30</i>    | 2.15 (1.05 to 4.40)        | 2.42 (1.14 to 5.12)                       |

<sup>^</sup> Adjusted for T<sub>0</sub> cancer distress, recruitment site, gender, age, marital group, deprivation and experience of lung cancer.

<sup>+</sup> Log<sub>n</sub> scores in normal text, original scores in italics (analyses performed using log<sub>n</sub> scores).
