# Supplementary material for: Impact of low-dose CT screening on smoking cessation among high-risk participants in the UK Lung Cancer Screening Trial
Source: PubMed Central journal article supplement (PMC5738533; doi:10.1136/thoraxjnl-2016-209690), 2017-07-14
Supplement: thoraxjnl-2016-209690supp005.pdf [file thoraxjnl-2016-209690supp005.pdf]

Supplementary Table V. Predictors of T<sub>2</sub> smoking cessation using the imputed population

| Quit smoking at T <sub>2</sub> (n=1524)            |                             |                                |                                |                            |                                           |
|----------------------------------------------------|-----------------------------|--------------------------------|--------------------------------|----------------------------|-------------------------------------------|
|                                                    |                             | Yes (n=194)<br>n (%) or M (SD) | No (n=1330)<br>n (%) or M (SD) | Univariable OR<br>(95% CI) | Multivariable OR <sup>^</sup><br>(95% CI) |
| <b>Trial allocation</b>                            | Intervention                | 115 (59%)                      | 634 (48%)                      | 1.60 (1.18 to 2.17)        | 1.60 (1.17 to 2.18)                       |
|                                                    | Control                     | 79 (41%)                       | 696 (52%)                      |                            |                                           |
| <b>Site</b>                                        | Liverpool                   | 100 (51%)                      | 741 (56%)                      | 1.18 (0.87 to 1.60)        | 0.95 (0.64 to 1.41)                       |
|                                                    | Cambridge                   | 94 (49%)                       | 589 (44%)                      |                            |                                           |
| <b>Age (years)</b>                                 | Up to 65 years              | 71 (37%)                       | 540 (41%)                      | - Reference -              | - Reference -                             |
|                                                    | 66 to 70 years              | 84 (43%)                       | 568 (43%)                      | 1.11 (0.80 to 1.58)        | 1.11 (0.79 to 1.57)                       |
|                                                    | Over 70 years               | 39 (20%)                       | 222 (17%)                      | 1.34 (0.88 to 2.04)        | 1.36 (0.88 to 2.09)                       |
| <b>Gender</b>                                      | Male                        | 144 (74%)                      | 925 (70%)                      | 0.79 (0.56 to 1.12)        | 0.80 (0.56 to 1.15)                       |
|                                                    | Female                      | 50 (26%)                       | 405 (30%)                      |                            |                                           |
| <b>Marital group</b>                               | Married/cohabiting          | 140 (72%)                      | 871 (66%)                      | 0.74 (0.53 to 1.03)        | 0.80 (0.56 to 1.14)                       |
|                                                    | Not married/cohabiting      | 54 (28%)                       | 456 (34%)                      |                            |                                           |
| <b>IMD</b>                                         | Quintile 1 (most deprived)  | 55 (28%)                       | 465 (35%)                      | - Reference -              | - Reference -                             |
|                                                    | Quintile 2                  | 25 (13%)                       | 163 (12%)                      | 1.30 (0.78 to 2.15)        | 1.26 (0.74 to 2.14)                       |
|                                                    | Quintile 3                  | 34 (18%)                       | 218 (16%)                      | 1.32 (0.84 to 2.09)        | 1.15 (0.69 to 1.91)                       |
|                                                    | Quintile 4                  | 37 (19%)                       | 203 (15%)                      | 1.54 (0.98 to 2.41)        | 1.53 (0.91 to 2.56)                       |
|                                                    | Quintile 5 (least deprived) | 43 (22%)                       | 281 (21%)                      | 1.30 (0.85 to 1.98)        | 1.23 (0.71 to 2.14)                       |
| <b>Lung cancer experience</b>                      | No                          | 117 (61%)                      | 745 (56%)                      | 0.81 (0.59 to 1.10)        | 0.85 (0.61 to 1.17)                       |
|                                                    | Yes                         | 74 (39%)                       | 584 (44%)                      |                            |                                           |
| <b>Cancer distress (T<sub>0</sub>)<sup>+</sup></b> |                             | 2.27 (0.28)<br><i>9.64</i>     | 2.23 (0.30)<br><i>9.33</i>     | 1.45 (0.88 to 2.39)        | 1.81 (1.07 to 3.08)                       |

<sup>^</sup> Adjusted for T<sub>0</sub> cancer distress, recruitment site, gender, age, marital group, deprivation and experience of lung cancer.

<sup>+</sup> Log<sub>n</sub> scores in normal text, original scores in italics (analyses performed using log<sub>n</sub> scores).
