# Supplementary material for: Impact of low-dose CT screening on smoking cessation among high-risk participants in the UK Lung Cancer Screening Trial
Source: PubMed Central journal article supplement (PMC5738533; doi:10.1136/thoraxjnl-2016-209690), 2017-07-14
Supplement: thoraxjnl-2016-209690supp006.pdf [file thoraxjnl-2016-209690supp006.pdf]

**Supplementary Table VI. Predictors of T<sub>2</sub> smoking cessation using complete case analysis**

| Quit smoking at T <sub>2</sub> (n=865)             |                             |                                    |                                   |                            |                                           |
|----------------------------------------------------|-----------------------------|------------------------------------|-----------------------------------|----------------------------|-------------------------------------------|
|                                                    |                             | Yes (n=194)<br>n (%) or M (SD)     | No (n=671)<br>n (%) or M (SD)     | Univariable OR<br>(95% CI) | Multivariable OR <sup>^</sup><br>(95% CI) |
| <b>Trial allocation</b>                            | Intervention                | 115 (59%)                          | 373 (55%)                         | 1.16 (0.84 to 1.61)        | 1.16 (0.65 to 1.33)                       |
|                                                    | Control                     | 79 (41%)                           | 298 (45%)                         |                            |                                           |
| <b>Site</b>                                        | Liverpool                   | 100 (51%)                          | 350 (52%)                         | 1.03 (0.74 to 1.43)        | 0.90 (0.59 to 1.37)                       |
|                                                    | Cambridge                   | 94 (49%)                           | 329 (48%)                         |                            |                                           |
| <b>Age (years)</b>                                 | Up to 65 years              | 71 (37%)                           | 270 (40%)                         | - Reference -              | - Reference -                             |
|                                                    | 66 to 70 years              | 84 (43%)                           | 295 (44%)                         | 1.08 (0.75 to 1.55)        | 1.08 (0.75 to 1.57)                       |
|                                                    | Over 70 years               | 39 (20%)                           | 106 (16%)                         | 1.49 (0.94 to 2.37)        | 1.54 (0.97 to 2.46)                       |
| <b>Gender</b>                                      | Male                        | 144 (74%)                          | 471 (69%)                         | 0.76 (0.53 to 1.10)        | 0.73 (0.50 to 1.07)                       |
|                                                    | Female                      | 50 (26%)                           | 208 (31%)                         |                            |                                           |
| <b>Marital group</b>                               | Married/cohabiting          | 140 (72%)                          | 458 (68%)                         | 0.86 (0.60 to 1.24)        | 0.94 (0.64 to 1.38)                       |
|                                                    | Not married/cohabiting      | 54 (28%)                           | 220 (32%)                         |                            |                                           |
| <b>IMD</b>                                         | Quintile 1 (most deprived)  | 55 (28%)                           | 218 (32%)                         | - Reference -              | - Reference -                             |
|                                                    | Quintile 2                  | 25 (13%)                           | 83 (12%)                          | 1.21 (0.70 to 2.10)        | 1.21 (0.69 to 2.13)                       |
|                                                    | Quintile 3                  | 34 (18%)                           | 102 (15%)                         | 1.37 (0.83 to 2.25)        | 1.25 (0.74 to 2.11)                       |
|                                                    | Quintile 4                  | 37 (19%)                           | 112 (17%)                         | 1.38 (0.85 to 2.24)        | 1.43 (0.82 to 2.49)                       |
|                                                    | Quintile 5 (least deprived) | 43 (22%)                           | 164 (24%)                         | 1.08 (0.68 to 1.71)        | 1.12 (0.62 to 2.05)                       |
| <b>Lung cancer experience</b>                      | No                          | 117 (61%)                          | 408 (60%)                         | 0.91 (0.65 to 1.28)        | 0.93 (0.65 to 1.33)                       |
|                                                    | Yes                         | 74 (39%)                           | 271 (40%)                         |                            |                                           |
| <b>Cancer distress (T<sub>0</sub>)<sup>+</sup></b> |                             | 2.27 (0.28)<br><i>10.01 (2.74)</i> | 2.23 (0.28)<br><i>9.63 (2.78)</i> | 1.69 (0.95 to 3.02)        | 1.99 (1.08 to 3.67)                       |

<sup>^</sup> Adjusted for T<sub>0</sub> cancer distress, recruitment site, gender, age, marital group, deprivation and experience of lung cancer.

<sup>+</sup> Log<sub>n</sub> scores in normal text, original scores in italics (analyses performed using log<sub>n</sub> scores).
